# Supplementary material for: Mass changes of the northern Antarctic Peninsula Ice Sheet derived from repeat bi-static synthetic aperture radar acquisitions for the period 2013–2017
Source: Copernicus journal article supplement (doi:10.5194/tc-17-4629-2023), 2023-11-06
Supplement: Supplementary file 1 [file tc-17-4629-2023-supplement.pdf]

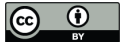

*Supplement of*

**Mass changes of the northern Antarctic Peninsula Ice Sheet derived from repeat bi-static synthetic aperture radar acquisitions for the period 2013–2017**

**Thorsten Seehaus et al.**

*Correspondence to:* Thorsten Seehaus (thorsten.seehaus@fau.de)

The copyright of individual parts of the supplement might differ from the article licence.

# 1 Evaluation of TanDEM-X elevation measurements

## 1.1 Comparison to IceBridge data:

The suitability of the processing approach was evaluated using IceBridge IDHDT4 surface elevation change rate ( $dh/dt$ ) data (Studinger, 2014) from a longer and shifted observation period (2011-2016), which was also employed by Rott et al. (2018) to validate TanDEM-X digital elevation models (DEMs) at the Larsen-B embayment.

The IDHDT4 data covers only limited sections of our study area. Similar to Rott et al. (2018), longitudinal profiles of outlet glaciers were selected, and very crevassed or steep slope areas and regions affected by front position changes were masked out. The IDHDT4 front prints of elevation change measurements represent surface areas of 250x250 m. For the comparison with our TanDEM-X  $dh/dt$  fields, the average TanDEM-X  $dh/dt$  value within a buffer of 125 m around the center of each IDHDT4 footprint was obtained.

In contrast to Rott et al. (2018), our observation period did not fit the IceBridge IDHDT4 measuring period. Consequently, considerable offsets between TanDEM-X and IDHDT4  $dh/dt$  measurements are revealed at some glaciers with dynamic change rates, like Drygalski, Crane, and Airy-Seller-Flemming (ASF) Glacier. At Drygalski and Crane glaciers, the ice dynamic adjustments due to the ice shelf disintegrations are leading to decreasing  $dh/dt$  rates within the IDHDT4 period from 2011-2016 (e.g. for Crane Glacier: -2.318 m/a for 2011-2013 and -0.753 m/a for 2013-2016; Rott et al. (2018)). At ASF Glacier an increasing trend in the surface lowering was revealed several kilometers in-land by Friedl et al. (2018). The trends revealed from both studies fit the discovered offsets between our TanDEM-X and the IDHDT4  $dh/dt$  rates (negative at Drygalski and Crane Glacier, positive at ASF Glacier). Consequently, these glaciers were not considered in the comparison of the elevation change rates from TanDEM-X (2013-2017) and IDHDT4 (2011-2016).

In total 1592 samples were evaluated. In Figure S1 the spatial distribution and the elevation change rate offsets between both datasets are illustrated. The scatter plot in Figure S2 illustrates the concordance of the  $dh/dt$  measurements. A positive offset indicates higher surface lowering rates for the IDHDT4 data. A mean offset of 0.12 m/a and a RMSD of 0.337 m/a is obtained. Both values are higher than the findings revealed by Rott et al. (2018) (mean offset of -0.08 m/a and RMSD of 0.20 m/a). However, in contrast to Rott et al. (2018), there is a temporal difference between both  $dh/dt$  data sets used in this study, which is most likely explaining the more pronounced differences as compared to Rott et al. (2018). In particular, the offsets in  $dh/dt$  in the upper reaches of Leppard and Attlee Glacier lead to some strongly negative offsets (see Figure S1 and S2) and increased RMSD value. These areas of the AP plateau receive higher accumulation rates than the low-lying areas on the east coast (e.g. van Wessem et al., 2015). Subsequently, surface elevations can vary strongly on inter-annual but also sub-annual scales, depending on the accumulation rates and timing of data acquisition. On the other hand differences in the SAR signal penetration between the TanDEM-X acquisitions in 2013 and 2017 can also lead to such offsets (see further below).

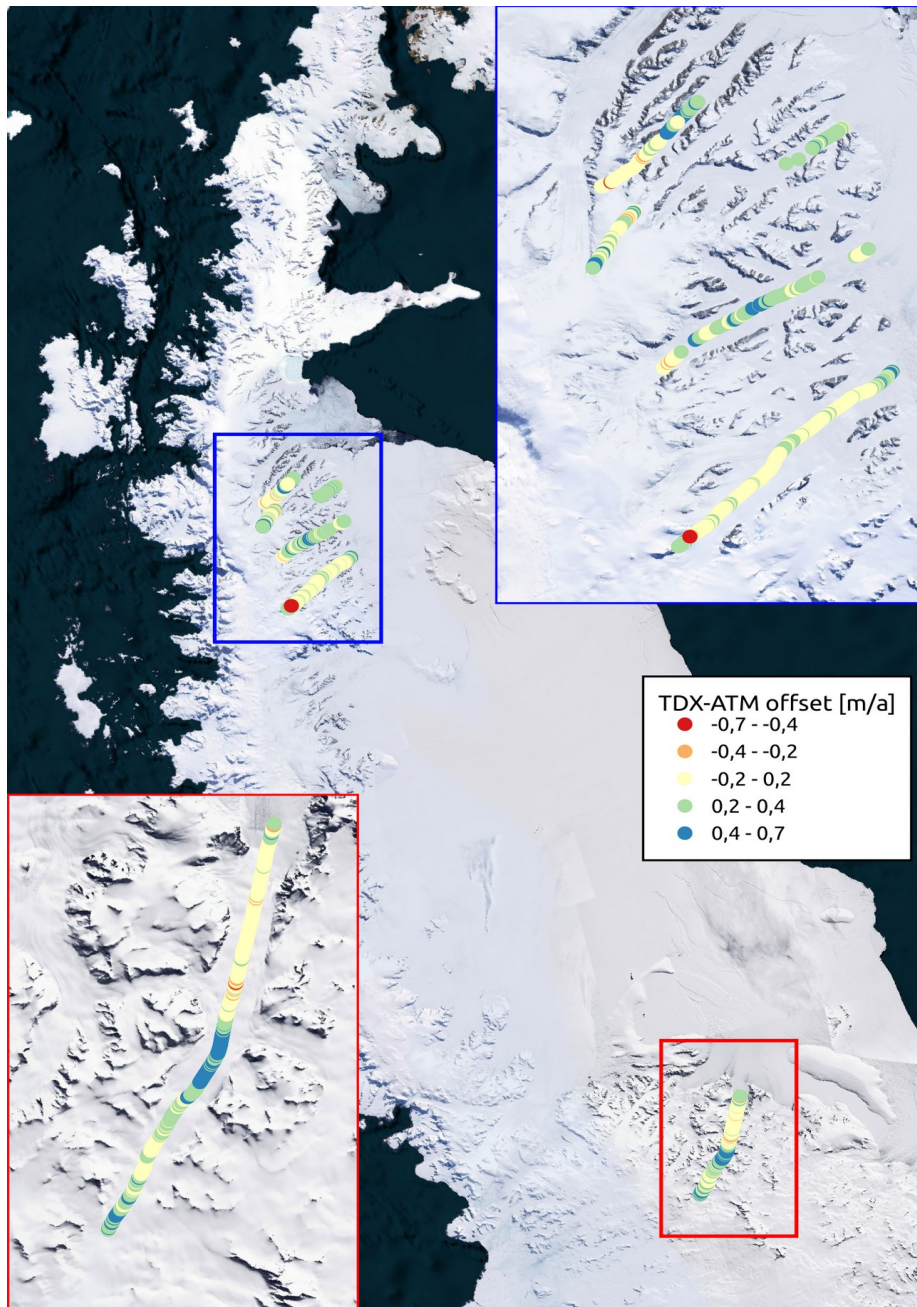

Figure S1: Spatial distribution of the offset between the TanDEM-X elevation change rates and the IceBridge ATM IDHDT4 data. Background: © Microsoft

(c) Microsoft

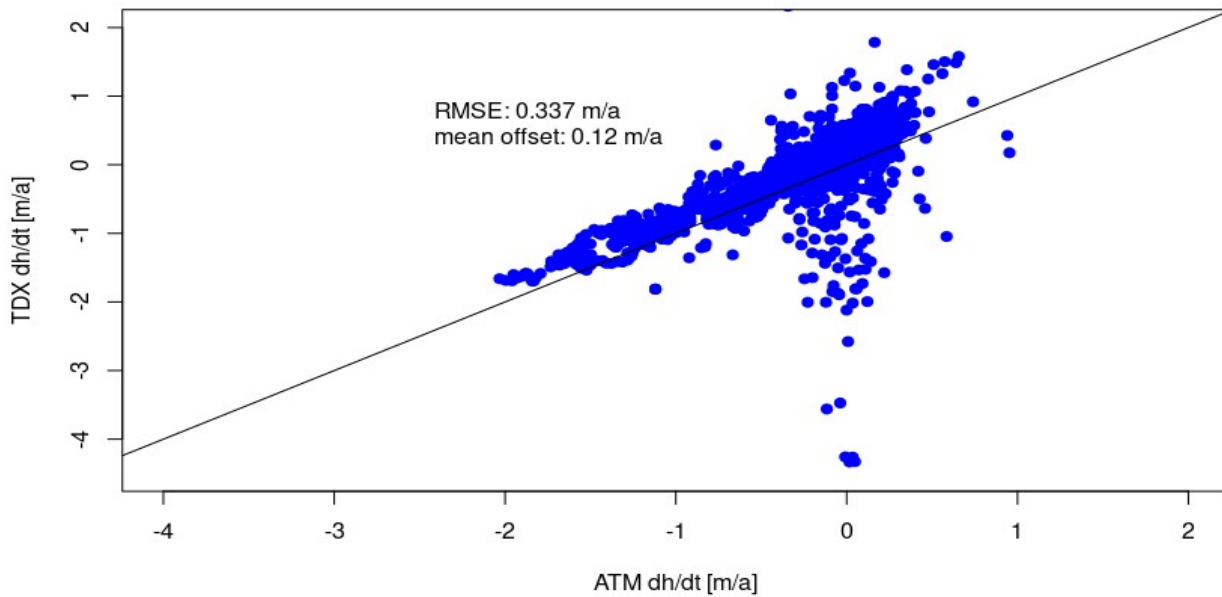

Figure S2: Scatter plot of TanDEM-X (TDX) and IceBridge ATM IDHDT4 elevation change measurements.

## 1.2 Comparison to REMA:

Contemporaneous time-stamped REMA tiles (Howat et al., 2022) for both TanDEM-X acquisition periods were downloaded at 2 m spatial resolution and bi-linearly resampled to the resolution of the TanDEM-X data (30 m). A temporal offset threshold of 30 days between the individual TanDEM-X acquisitions and the REMA data was applied at pixel level to minimize the impact of surface elevation changes due to temporal offsets. Since the TanDEM-X data was acquired during austral-winter, the amount of available contemporaneous REMA data is quite limited. Subsequently, the provided REMA bitmask was applied to remove unreliable or interpolated information. Only REMA DEM values with bitmask value = 1 were kept. Subsequently, the REMA DEM tiles were horizontally coregistered and vertically corrected for offsets on the rock outcrops (similar to the TanDEM-X raw DEMs, see Section 3 main manuscript). Due to large data gaps and low spatial coverage of the areas used for the coregistration for several REMA tiles, the coregistration did not work and the affected REMA tiles were dismissed. Finally, the remaining REMA tiles and the TanDEM-X DEMs of the respective acquisition periods were differentiated to assess the offset between both surface elevation data sets. The limited availability of REMA data in austral-winter and the coregistration issues led to a limited coverage by elevation difference measurements between the TanDEM-X and REMA data. In Figure S3 the resulting elevation difference map for both TanDEM-X acquisition periods are plotted. The REMA DEM coverages for both periods (2013 and 2017) do not overlap. Consequently, we analyzed each period independently. In Figure S4 the hypsometric distribution of the offsets are illustrated. Negative values indicate that TanDEM-X heights were below the REMA surface, which serves as an indicator for SAR signal penetration. The offsets between REMA and TanDEM-X in 2013 show no trend with elevation, whereas for 2017 a slight trend towards higher offsets in regions above  $\sim 1800$  m a.s.l. is visible. This finding supports our assumption of a potential SAR signal penetration offset between both acquisitions for elevated regions. (Note: The offsets are measured at different locations and thus SAR signal penetration offset between our TanDEM-X coverage in 2013 and 2017 can not be derived from this data, since the SAR signal penetration can vary strongly on spatial scales, e.g. due to different accumulation rates or melt rates). However, we concluded, that the TanDEM-X and REMA surface

elevations agree quite well ( $<1$  m average offset, which we attribute to SAR signal penetration) for both periods, demonstrating the suitability of our TanDEM-X DEMs as an elevation information source for the study region.

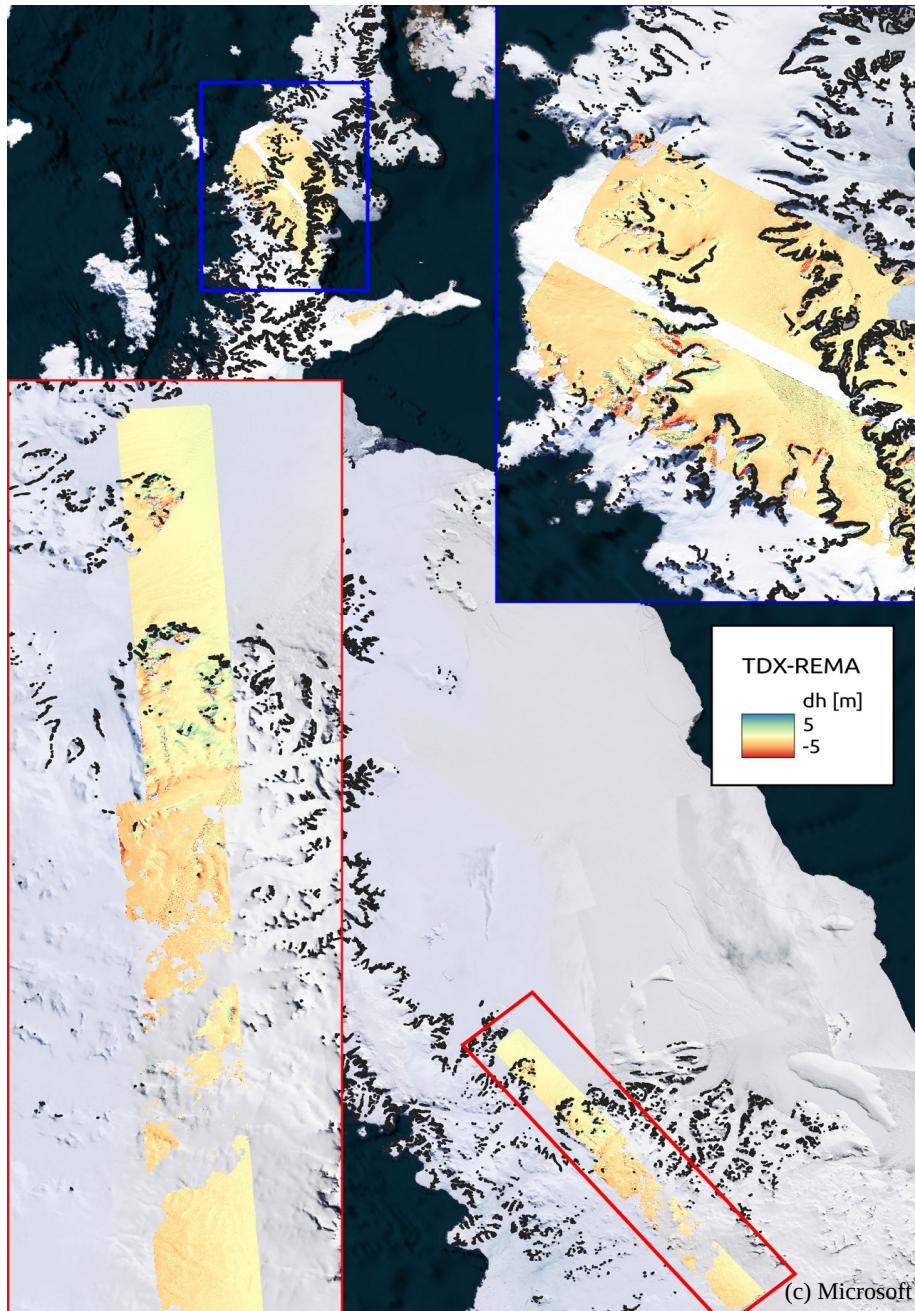

**Figure S3: Spatial coverage of elevation differences between contemporaneous TanDEM-X and REMA DEMs for 2013 (blue polygon) and 2017 (red polygon). Background © Microsoft**

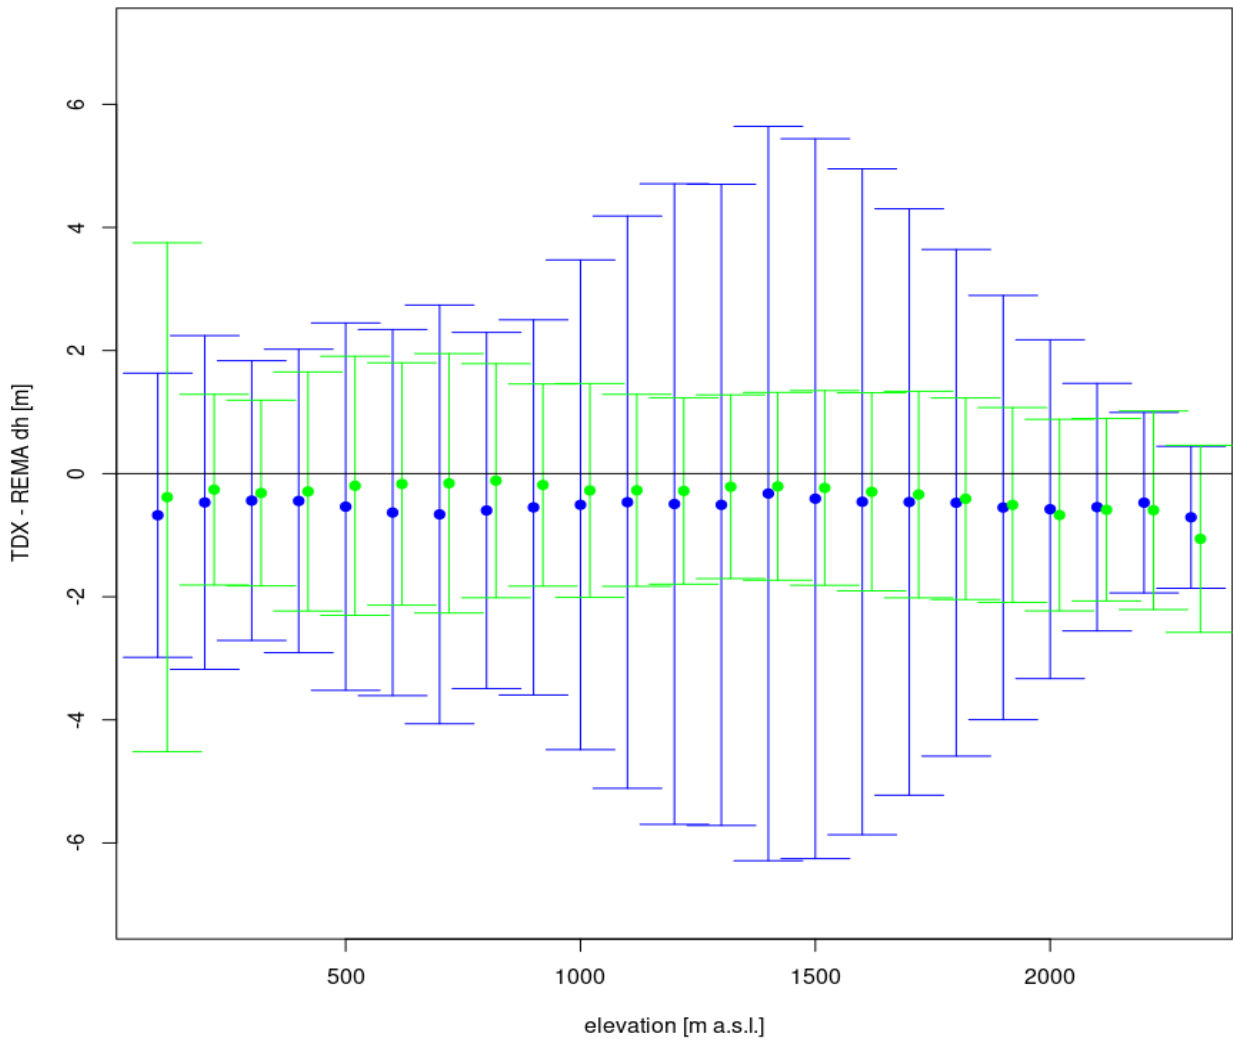

**Figure S4: Hypsometric distribution of differences between contemporaneous TanDEM-X and REMA DEMs for 2013 (blue) and 2017 (green). Whiskers indicate root mean square differences (RMSD) for the respective elevation bin**

## 2 SAR backscatter analysis

We carried out an analysis of the SAR backscatter for both TanDEM-X acquisition periods similar to Sommer et al. (2022). The hypsometric distribution of the SAR backscatter values is plotted for both periods in Figure S5. The backscatter values show a similar trend for both periods, with a small average offset of  $\sim 1\text{-}2$  db, and consequently similar backscatter characteristics of the surfaces. However, there is a slight increased offset between the mean values for each elevation bin visible towards higher elevations (above  $\sim 1800$  m a.s.l.). This finding supports our assumption of a potential SAR signal penetration bias at higher elevations.

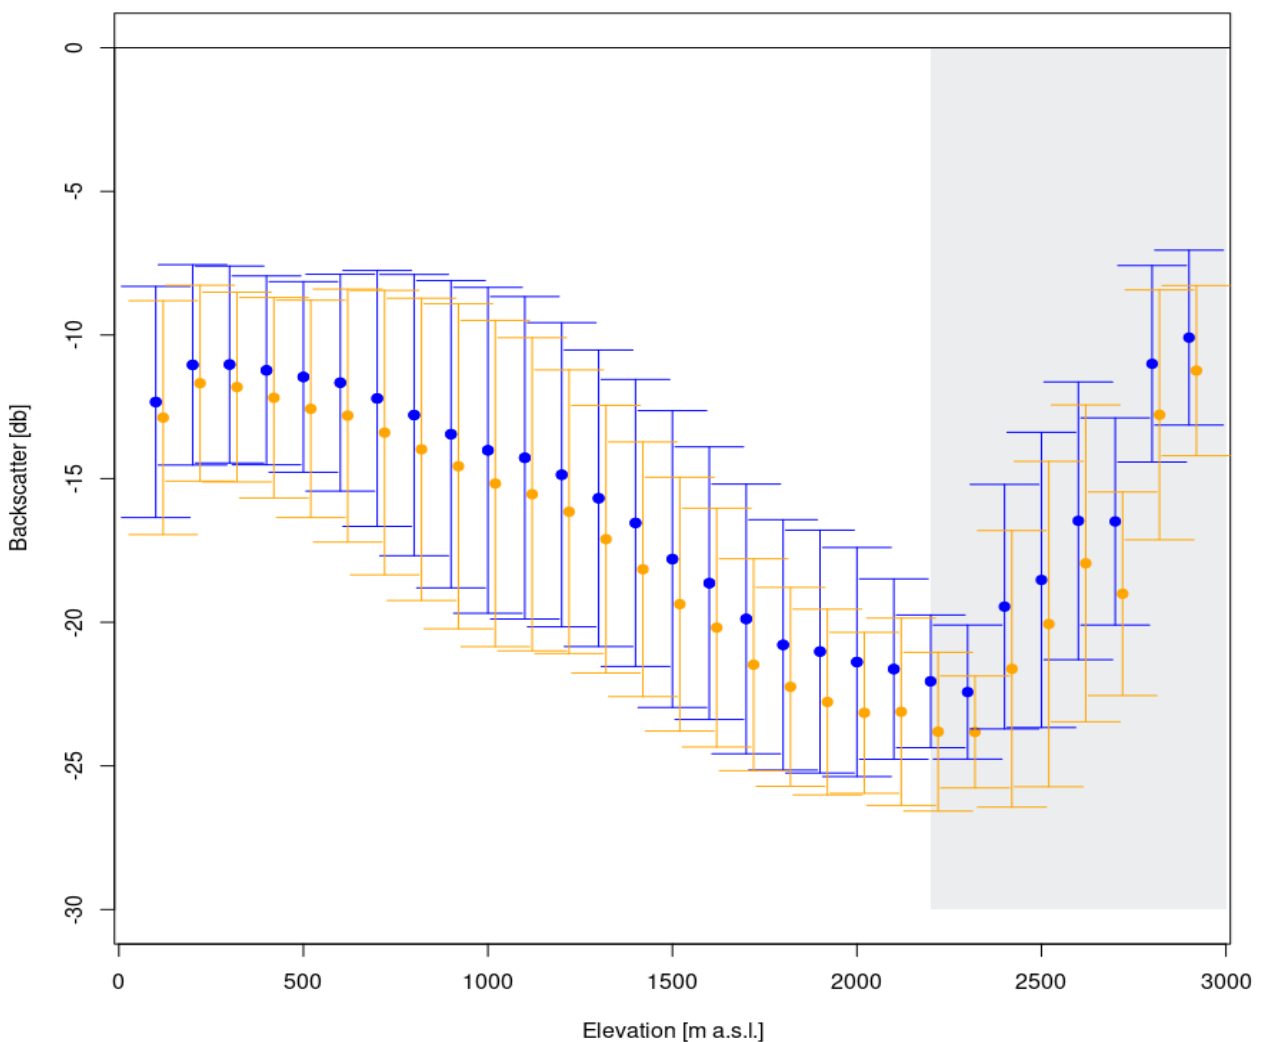

**Figure S5: Hypsometric distribution of SAR backscatter values for 2013 (blue) and 2017 (orange). Whiskers indicate normalized mean absolute deviation (NMAD). The gray area marks the upper 1% quantile of the total glacier area distribution (see Figure 3 in the main manuscript)**

### 3 Overview of used TanDEM-X acquisitions

Tables S1: Summary of employed TanDEM-X acquisitions.

| Start date & time<br>[YYYYMMDD-hhmmss] | End date & time<br>[YYYYMMDD-hhmmss] | Orbit direction<br>A – ascending<br>D - descending | Rel. orbit number | Beam config. number | Incidence angle<br>[°] | Effective baseline<br>[m] | Height of ambiguity<br>[m] |
|----------------------------------------|--------------------------------------|----------------------------------------------------|-------------------|---------------------|------------------------|---------------------------|----------------------------|
| 20130609T082314                        | 20130609T082322                      | D                                                  | 125               | 40                  | 38.51                  | 115.2                     | -53.2                      |
| 20130609T082321                        | 20130609T082329                      | D                                                  | 125               | 40                  | 38.55                  | 115.2                     | -53.3                      |
| 20130609T082328                        | 20130609T082336                      | D                                                  | 125               | 40                  | 38.55                  | 115.2                     | -53.4                      |
| 20130609T082335                        | 20130609T082343                      | D                                                  | 125               | 40                  | 38.48                  | 115.2                     | -53.5                      |
| 20130609T082342                        | 20130609T082350                      | D                                                  | 125               | 40                  | 38.56                  | 115.2                     | -53.8                      |
| 20130609T082349                        | 20130609T082357                      | D                                                  | 125               | 40                  | 38.58                  | 115.2                     | -54                        |
| 20130609T082356                        | 20130609T082404                      | D                                                  | 125               | 40                  | 38.56                  | 115.2                     | -54.1                      |
| 20130609T082403                        | 20130609T082411                      | D                                                  | 125               | 40                  | 38.55                  | 115.2                     | -54.3                      |
| 20130609T082410                        | 20130609T082418                      | D                                                  | 125               | 40                  | 38.53                  | 115.2                     | -54.4                      |
| 20130609T082417                        | 20130609T082425                      | D                                                  | 125               | 40                  | 38.51                  | 115.2                     | -54.6                      |
| 20130609T082424                        | 20130609T082432                      | D                                                  | 125               | 40                  | 38.49                  | 115.2                     | -54.7                      |
| 20130609T082431                        | 20130609T082439                      | D                                                  | 125               | 40                  | 38.49                  | 115.2                     | -54.9                      |
| 20130609T082438                        | 20130609T082446                      | D                                                  | 125               | 40                  | 38.52                  | 115.2                     | -55.1                      |
| 20130609T082445                        | 20130609T082453                      | D                                                  | 125               | 40                  | 38.56                  | 115.2                     | -55.3                      |
| 20130609T082452                        | 20130609T082500                      | D                                                  | 125               | 40                  | 38.52                  | 115.2                     | -55.4                      |
| 20130609T082459                        | 20130609T082507                      | D                                                  | 125               | 40                  | 38.49                  | 115.2                     | -55.6                      |
| 20130609T082506                        | 20130609T082514                      | D                                                  | 125               | 40                  | 38.46                  | 115.2                     | -55.8                      |
| 20130615T081437                        | 20130615T081445                      | D                                                  | 49                | 60                  | 42.75                  | 124.7                     | -58.3                      |
| 20130615T081444                        | 20130615T081452                      | D                                                  | 49                | 60                  | 42.8                   | 124.7                     | -58.5                      |
| 20130615T081451                        | 20130615T081459                      | D                                                  | 49                | 60                  | 42.82                  | 124.7                     | -58.6                      |
| 20130615T081458                        | 20130615T081506                      | D                                                  | 49                | 60                  | 42.78                  | 124.7                     | -58.7                      |
| 20130615T081526                        | 20130615T081534                      | D                                                  | 49                | 60                  | 42.74                  | 124.7                     | -59.3                      |
| 20130615T081533                        | 20130615T081541                      | D                                                  | 49                | 60                  | 42.79                  | 124.7                     | -59.5                      |
| 20130615T081540                        | 20130615T081548                      | D                                                  | 49                | 60                  | 42.77                  | 124.7                     | -59.7                      |
| 20130615T081547                        | 20130615T081555                      | D                                                  | 49                | 60                  | 42.76                  | 124.7                     | -59.8                      |
| 20130615T081554                        | 20130615T081602                      | D                                                  | 49                | 60                  | 42.75                  | 124.7                     | -60                        |
| 20130615T081601                        | 20130615T081609                      | D                                                  | 49                | 60                  | 42.74                  | 124.7                     | -60.2                      |
| 20130615T081608                        | 20130615T081616                      | D                                                  | 49                | 60                  | 42.75                  | 124.7                     | -60.3                      |
| 20130615T081615                        | 20130615T081623                      | D                                                  | 49                | 60                  | 42.79                  | 124.7                     | -60.5                      |
| 20130615T081622                        | 20130615T081630                      | D                                                  | 49                | 60                  | 42.78                  | 124.7                     | -60.7                      |
| 20130615T081629                        | 20130615T081637                      | D                                                  | 49                | 60                  | 42.75                  | 124.7                     | -60.9                      |
| 20130615T081636                        | 20130615T081644                      | D                                                  | 49                | 60                  | 42.71                  | 124.7                     | -61.1                      |
| 20130620T082322                        | 20130620T082330                      | D                                                  | 125               | 50                  | 40.63                  | 119.2                     | -56.6                      |
| 20130620T082329                        | 20130620T082337                      | D                                                  | 125               | 50                  | 40.66                  | 119.2                     | -56.7                      |
| 20130620T082336                        | 20130620T082344                      | D                                                  | 125               | 50                  | 40.65                  | 119.2                     | -56.9                      |
| 20130620T082343                        | 20130620T082351                      | D                                                  | 125               | 50                  | 40.76                  | 119.2                     | -57.2                      |
| 20130620T082350                        | 20130620T082358                      | D                                                  | 125               | 50                  | 40.74                  | 119.2                     | -57.3                      |
| 20130620T082357                        | 20130620T082405                      | D                                                  | 125               | 50                  | 40.73                  | 119.2                     | -57.5                      |
| 20130620T082404                        | 20130620T082412                      | D                                                  | 125               | 50                  | 40.7                   | 119.2                     | -57.6                      |
| 20130620T082411                        | 20130620T082419                      | D                                                  | 125               | 50                  | 40.67                  | 119.2                     | -57.8                      |
| 20130620T082418                        | 20130620T082426                      | D                                                  | 125               | 50                  | 40.64                  | 119.2                     | -57.9                      |
| 20130620T082425                        | 20130620T082433                      | D                                                  | 125               | 50                  | 40.63                  | 119.2                     | -58.1                      |
| 20130620T082432                        | 20130620T082440                      | D                                                  | 125               | 50                  | 40.65                  | 119.2                     | -58.3                      |
| 20130620T082439                        | 20130620T082447                      | D                                                  | 125               | 50                  | 40.69                  | 119.2                     | -58.5                      |
| 20130620T082446                        | 20130620T082454                      | D                                                  | 125               | 50                  | 40.68                  | 119.2                     | -58.7                      |
| 20130620T082453                        | 20130620T082501                      | D                                                  | 125               | 50                  | 40.65                  | 119.2                     | -58.9                      |
| 20130620T082500                        | 20130620T082508                      | D                                                  | 125               | 50                  | 40.62                  | 119.2                     | -59.1                      |
| 20130620T082507                        | 20130620T082515                      | D                                                  | 125               | 50                  | 40.62                  | 119.2                     | -59.3                      |



|                 |                 |   |     |    |       |       |       |
|-----------------|-----------------|---|-----|----|-------|-------|-------|
| 20130621T080724 | 20130621T080732 | D | 140 | 50 | 40.66 | 116.6 | -58.7 |
| 20130621T080731 | 20130621T080739 | D | 140 | 50 | 40.65 | 116.6 | -58.9 |
| 20130621T080738 | 20130621T080746 | D | 140 | 50 | 40.65 | 116.6 | -59.1 |
| 20130621T080745 | 20130621T080753 | D | 140 | 50 | 40.64 | 116.6 | -59.2 |
| 20130621T080752 | 20130621T080800 | D | 140 | 50 | 40.74 | 116.6 | -59.4 |
| 20130621T080759 | 20130621T080807 | D | 140 | 50 | 40.73 | 116.6 | -59.6 |
| 20130625T083241 | 20130625T083249 | D | 34  | 60 | 42.74 | 122   | -60.8 |
| 20130625T083248 | 20130625T083256 | D | 34  | 60 | 42.73 | 122   | -60.9 |
| 20130625T083255 | 20130625T083303 | D | 34  | 60 | 42.73 | 122   | -61.1 |
| 20130625T083302 | 20130625T083310 | D | 34  | 60 | 42.72 | 122   | -61.3 |
| 20130625T083309 | 20130625T083317 | D | 34  | 60 | 42.72 | 122   | -61.5 |
| 20130626T081437 | 20130626T081445 | D | 49  | 40 | 38.49 | 118.8 | -54.4 |
| 20130626T081547 | 20130626T081555 | D | 49  | 40 | 38.5  | 114.1 | -56.2 |
| 20130626T081554 | 20130626T081602 | D | 49  | 40 | 38.48 | 114.1 | -56.3 |
| 20130626T081601 | 20130626T081609 | D | 49  | 40 | 38.47 | 114.1 | -56.5 |
| 20130626T081608 | 20130626T081616 | D | 49  | 40 | 38.5  | 114.1 | -56.7 |
| 20130626T081615 | 20130626T081623 | D | 49  | 40 | 38.54 | 114.1 | -56.9 |
| 20130626T081622 | 20130626T081630 | D | 49  | 40 | 38.6  | 114.1 | -57.2 |
| 20130626T081629 | 20130626T081637 | D | 49  | 40 | 38.57 | 114.1 | -57.3 |
| 20130627T075908 | 20130627T075916 | D | 64  | 60 | 42.72 | 119.7 | -62.2 |
| 20130627T075915 | 20130627T075923 | D | 64  | 60 | 42.77 | 119.7 | -62.4 |
| 20130701T082254 | 20130701T082259 | D | 125 | 40 | 38.48 | 119.8 | 54    |
| 20130701T082329 | 20130701T082337 | D | 125 | 60 | 42.73 | 120.9 | -60.3 |
| 20130701T082336 | 20130701T082344 | D | 125 | 60 | 42.75 | 120.9 | -60.5 |
| 20130701T082343 | 20130701T082351 | D | 125 | 60 | 42.78 | 120.9 | -60.6 |
| 20130701T082350 | 20130701T082358 | D | 125 | 60 | 42.72 | 120.9 | -60.7 |
| 20130701T082357 | 20130701T082405 | D | 125 | 60 | 42.72 | 120.9 | -60.9 |
| 20130701T082404 | 20130701T082412 | D | 125 | 60 | 42.83 | 120.9 | -61.2 |
| 20130701T082411 | 20130701T082419 | D | 125 | 60 | 42.83 | 120.9 | -61.4 |
| 20130701T082418 | 20130701T082426 | D | 125 | 60 | 42.8  | 120.9 | -61.5 |
| 20130701T082425 | 20130701T082433 | D | 125 | 60 | 42.78 | 120.9 | -61.7 |
| 20130701T082432 | 20130701T082440 | D | 125 | 60 | 42.79 | 120.9 | -61.9 |
| 20130701T082439 | 20130701T082447 | D | 125 | 60 | 42.75 | 120.9 | -62.1 |
| 20130702T080731 | 20130702T080739 | D | 140 | 60 | 42.74 | 119   | -62.4 |
| 20130702T080738 | 20130702T080746 | D | 140 | 60 | 42.76 | 119   | -62.7 |
| 20130702T080745 | 20130702T080753 | D | 140 | 60 | 42.74 | 119   | -62.8 |
| 20130702T080752 | 20130702T080800 | D | 140 | 60 | 42.71 | 119   | -62.9 |
| 20130702T080759 | 20130702T080807 | D | 140 | 60 | 42.73 | 119   | -63.1 |
| 20130712T082323 | 20130712T082331 | D | 125 | 30 | 36.28 | 98.4  | -60.8 |
| 20130728T083222 | 20130728T083230 | D | 34  | 50 | 40.68 | 101.1 | -68.3 |
| 20130728T083222 | 20130728T083230 | D | 34  | 50 | 40.68 | 101.1 | -68.3 |
| 20130728T083229 | 20130728T083237 | D | 34  | 50 | 40.66 | 101.1 | -68.4 |
| 20130728T083236 | 20130728T083244 | D | 34  | 50 | 40.65 | 101.1 | -68.5 |
| 20130728T083243 | 20130728T083251 | D | 34  | 50 | 40.67 | 101.1 | -68.5 |
| 20130728T083250 | 20130728T083258 | D | 34  | 50 | 40.69 | 101.1 | -68.7 |
| 20130728T083257 | 20130728T083305 | D | 34  | 50 | 40.66 | 101.1 | -68.7 |
| 20130728T083304 | 20130728T083312 | D | 34  | 50 | 40.63 | 101.1 | -68.8 |
| 20130729T081440 | 20130729T081448 | D | 49  | 50 | 40.64 | 100.2 | -68.6 |
| 20130729T081447 | 20130729T081455 | D | 49  | 50 | 40.63 | 100.2 | -68.6 |
| 20130729T081529 | 20130729T081537 | D | 49  | 50 | 40.67 | 100.2 | -69.2 |
| 20130729T081550 | 20130729T081558 | D | 49  | 50 | 40.62 | 100.2 | -69.4 |
| 20130729T081557 | 20130729T081605 | D | 49  | 50 | 40.59 | 100.2 | -69.5 |
| 20130729T081604 | 20130729T081612 | D | 49  | 50 | 40.58 | 100.2 | -69.6 |
| 20130729T081611 | 20130729T081619 | D | 49  | 50 | 40.6  | 100.2 | -69.7 |
| 20130729T081618 | 20130729T081626 | D | 49  | 50 | 40.66 | 100.2 | -69.8 |
| 20130729T081625 | 20130729T081633 | D | 49  | 50 | 40.69 | 100.2 | -69.9 |

|                 |                 |   |     |    |       |       |        |
|-----------------|-----------------|---|-----|----|-------|-------|--------|
| 20130729T081632 | 20130729T081640 | D | 49  | 50 | 40.67 | 100.2 | -70.1  |
| 20130729T081639 | 20130729T081647 | D | 49  | 50 | 40.62 | 100.2 | -70.2  |
| 20130804T080734 | 20130804T080742 | D | 140 | 40 | 38.46 | 93.8  | -67.3  |
| 20130804T080741 | 20130804T080749 | D | 140 | 40 | 38.45 | 93.8  | -67.4  |
| 20130804T080748 | 20130804T080756 | D | 140 | 40 | 38.52 | 93.8  | -67.6  |
| 20130804T080755 | 20130804T080803 | D | 140 | 40 | 38.55 | 93.8  | -67.7  |
| 20140623T083218 | 20140623T083226 | D | 34  | 45 | 39.33 | 169.9 | -38.6  |
| 20140623T083225 | 20140623T083233 | D | 34  | 45 | 39.31 | 169.9 | -38.7  |
| 20140623T083232 | 20140623T083240 | D | 34  | 45 | 39.3  | 169.9 | -38.8  |
| 20140623T083239 | 20140623T083247 | D | 34  | 45 | 39.28 | 169.9 | -38.8  |
| 20140623T083246 | 20140623T083254 | D | 34  | 45 | 39.27 | 169.9 | -38.9  |
| 20140623T083253 | 20140623T083301 | D | 34  | 45 | 39.26 | 169.9 | -39    |
| 20140623T083300 | 20140623T083308 | D | 34  | 45 | 39.29 | 169.9 | -39.1  |
| 20140623T083307 | 20140623T083315 | D | 34  | 45 | 39.34 | 169.9 | -39.2  |
| 20140623T083314 | 20140623T083322 | D | 34  | 45 | 39.36 | 169.9 | -39.4  |
| 20140623T083321 | 20140623T083329 | D | 34  | 45 | 39.35 | 169.9 | -39.4  |
| 20140721T082343 | 20140721T082350 | D | 125 | 65 | 43.47 | 162.2 | -46.7  |
| 20140721T082349 | 20140721T082357 | D | 125 | 65 | 43.45 | 162.2 | -46.7  |
| 20140721T082356 | 20140721T082404 | D | 125 | 65 | 43.39 | 162.2 | -46.8  |
| 20140721T082403 | 20140721T082411 | D | 125 | 65 | 43.33 | 162.2 | -46.8  |
| 20140721T082410 | 20140721T082418 | D | 125 | 65 | 43.35 | 162.2 | -46.9  |
| 20140721T082417 | 20140721T082425 | D | 125 | 65 | 43.34 | 162.2 | -47    |
| 20140721T082424 | 20140721T082432 | D | 125 | 65 | 43.36 | 162.2 | -47.1  |
| 20140721T082431 | 20140721T082439 | D | 125 | 65 | 43.38 | 162.2 | -47.2  |
| 20140721T082438 | 20140721T082446 | D | 125 | 65 | 43.38 | 162.2 | -47.3  |
| 20170514T083249 | 20170514T083257 | D | 34  | 5  | 30.02 | 112.9 | -41.5  |
| 20170514T083256 | 20170514T083304 | D | 34  | 5  | 30.01 | 112.9 | -41.7  |
| 20170514T083303 | 20170514T083311 | D | 34  | 5  | 30.07 | 112.9 | -41.9  |
| 20170519T084148 | 20170519T084156 | D | 110 | 5  | 30.05 | 114.9 | -42    |
| 20170519T084155 | 20170519T084203 | D | 110 | 5  | 30.05 | 114.9 | -42.2  |
| 20170519T084202 | 20170519T084210 | D | 110 | 5  | 30.08 | 114.9 | -42.4  |
| 20170519T084209 | 20170519T084217 | D | 110 | 5  | 30.11 | 114.9 | -42.7  |
| 20170519T084216 | 20170519T084224 | D | 110 | 5  | 30.04 | 114.9 | -42.8  |
| 20170530T084121 | 20170530T084129 | D | 110 | 15 | 32.52 | 107.9 | -48.3  |
| 20170530T084128 | 20170530T084136 | D | 110 | 15 | 32.49 | 107.9 | -48.5  |
| 20170530T084135 | 20170530T084143 | D | 110 | 15 | 32.51 | 107.9 | -48.7  |
| 20170530T084142 | 20170530T084150 | D | 110 | 15 | 32.56 | 107.9 | -48.9  |
| 20170530T084149 | 20170530T084157 | D | 110 | 15 | 32.55 | 107.9 | -49.2  |
| 20170530T084156 | 20170530T084204 | D | 110 | 15 | 32.49 | 107.9 | -49.4  |
| 20170530T084203 | 20170530T084211 | D | 110 | 15 | 32.52 | 107.9 | -49.7  |
| 20170530T084210 | 20170530T084218 | D | 110 | 15 | 32.49 | 107.9 | -49.9  |
| 20170602T235002 | 20170602T235009 | A | 165 | 90 | 47.82 | 58.9  | -148.7 |
| 20170602T235008 | 20170602T235016 | A | 165 | 90 | 47.82 | 58.9  | -151.1 |
| 20170602T235015 | 20170602T235018 | A | 165 | 90 | 47.84 | 58.9  | -152.6 |
| 20170605T083215 | 20170605T083223 | D | 34  | 15 | 32.49 | 114.6 | -43.7  |
| 20170605T083222 | 20170605T083230 | D | 34  | 15 | 32.55 | 114.6 | -44    |
| 20170605T083229 | 20170605T083237 | D | 34  | 15 | 32.52 | 114.6 | -44.2  |
| 20170605T083236 | 20170605T083244 | D | 34  | 15 | 32.45 | 114.6 | -44.4  |
| 20170605T083243 | 20170605T083251 | D | 34  | 15 | 32.47 | 114.6 | -44.7  |
| 20170605T083250 | 20170605T083258 | D | 34  | 15 | 32.49 | 114.6 | -45    |
| 20170605T083257 | 20170605T083305 | D | 34  | 15 | 32.48 | 114.6 | -45.2  |
| 20170605T083304 | 20170605T083312 | D | 34  | 15 | 32.49 | 114.6 | -45.5  |
| 20170605T083311 | 20170605T083319 | D | 34  | 15 | 32.48 | 114.6 | -45.8  |
| 20170605T083318 | 20170605T083326 | D | 34  | 15 | 32.47 | 114.6 | -46    |
| 20170605T083325 | 20170605T083333 | D | 34  | 15 | 32.47 | 114.6 | -46.3  |
| 20170605T083332 | 20170605T083340 | D | 34  | 15 | 32.46 | 114.6 | -46.5  |

|                 |                 |   |     |    |       |       |        |
|-----------------|-----------------|---|-----|----|-------|-------|--------|
| 20170605T083339 | 20170605T083347 | D | 34  | 15 | 32.51 | 114.6 | -46.9  |
| 20170605T083346 | 20170605T083354 | D | 34  | 15 | 32.48 | 114.6 | -47.1  |
| 20170605T083353 | 20170605T083401 | D | 34  | 15 | 32.49 | 114.6 | -47.5  |
| 20170605T083400 | 20170605T083408 | D | 34  | 15 | 32.45 | 114.6 | -47.7  |
| 20170606T081624 | 20170606T081632 | D | 49  | 25 | 34.83 | 113.5 | -49.5  |
| 20170606T081631 | 20170606T081639 | D | 49  | 25 | 34.84 | 113.5 | -49.8  |
| 20170606T081638 | 20170606T081646 | D | 49  | 25 | 34.89 | 113.5 | -50.1  |
| 20170606T081645 | 20170606T081653 | D | 49  | 25 | 34.99 | 113.5 | -50.5  |
| 20170606T081652 | 20170606T081700 | D | 49  | 25 | 34.95 | 113.5 | -50.7  |
| 20170606T081659 | 20170606T081707 | D | 49  | 25 | 34.93 | 113.5 | -51    |
| 20170609T232430 | 20170609T232437 | A | 104 | 20 | 33.84 | 16.6  | -346.1 |
| 20170611T082331 | 20170611T082339 | D | 125 | 15 | 32.48 | 115   | -43.5  |
| 20170611T082338 | 20170611T082346 | D | 125 | 15 | 32.48 | 115   | -43.7  |
| 20170611T082455 | 20170611T082503 | D | 125 | 15 | 32.45 | 115   | -46.5  |
| 20170611T082502 | 20170611T082510 | D | 125 | 15 | 32.46 | 115   | -46.8  |
| 20170611T082509 | 20170611T082517 | D | 125 | 15 | 32.52 | 115   | -47.1  |
| 20170611T082516 | 20170611T082524 | D | 125 | 15 | 32.55 | 115   | -47.4  |
| 20170611T082523 | 20170611T082531 | D | 125 | 15 | 32.47 | 115   | -47.6  |
| 20170611T082530 | 20170611T082535 | D | 125 | 15 | 32.44 | 115   | -47.8  |
| 20170613T234954 | 20170613T235002 | A | 165 | 40 | 38.46 | 32.9  | -201.3 |
| 20170613T235001 | 20170613T235006 | A | 165 | 40 | 38.49 | 32.9  | -207   |
| 20170616T083223 | 20170616T083231 | D | 34  | 25 | 34.86 | 126.1 | -43.7  |
| 20170616T083230 | 20170616T083238 | D | 34  | 25 | 34.88 | 126.1 | -44    |
| 20170616T083237 | 20170616T083245 | D | 34  | 25 | 34.9  | 126.1 | -44.2  |
| 20170616T083244 | 20170616T083252 | D | 34  | 25 | 34.88 | 126.1 | -44.5  |
| 20170616T083251 | 20170616T083259 | D | 34  | 25 | 34.89 | 126.1 | -44.8  |
| 20170616T083258 | 20170616T083306 | D | 34  | 25 | 34.87 | 126.1 | -45    |
| 20170616T083305 | 20170616T083313 | D | 34  | 25 | 34.87 | 126.1 | -45.3  |
| 20170616T083312 | 20170616T083320 | D | 34  | 25 | 34.86 | 126.1 | -45.6  |
| 20170616T083319 | 20170616T083327 | D | 34  | 25 | 34.85 | 126.1 | -45.9  |
| 20170616T083326 | 20170616T083334 | D | 34  | 25 | 34.87 | 126.1 | -46.2  |
| 20170616T083333 | 20170616T083341 | D | 34  | 25 | 34.91 | 126.1 | -46.5  |
| 20170616T083340 | 20170616T083348 | D | 34  | 25 | 34.9  | 126.1 | -46.8  |
| 20170616T083347 | 20170616T083355 | D | 34  | 25 | 34.89 | 126.1 | -47.2  |
| 20170621T084114 | 20170621T084122 | D | 110 | 25 | 34.91 | 128.2 | -44.2  |
| 20170621T084121 | 20170621T084129 | D | 110 | 25 | 34.87 | 128.2 | -44.5  |
| 20170621T084128 | 20170621T084136 | D | 110 | 25 | 34.86 | 128.2 | -44.7  |
| 20170621T084135 | 20170621T084143 | D | 110 | 25 | 34.86 | 128.2 | -45    |
| 20170621T084142 | 20170621T084150 | D | 110 | 25 | 34.83 | 128.2 | -45.2  |
| 20170621T084149 | 20170621T084157 | D | 110 | 25 | 34.86 | 128.2 | -45.6  |
| 20170621T084156 | 20170621T084204 | D | 110 | 25 | 34.9  | 128.2 | -45.9  |
| 20170622T082332 | 20170622T082340 | D | 125 | 25 | 34.9  | 126.8 | -43.1  |
| 20170622T082339 | 20170622T082347 | D | 125 | 25 | 34.88 | 126.8 | -43.3  |
| 20170622T082346 | 20170622T082354 | D | 125 | 25 | 34.86 | 126.8 | -43.6  |
| 20170622T082353 | 20170622T082401 | D | 125 | 25 | 34.84 | 126.8 | -43.8  |
| 20170622T082400 | 20170622T082408 | D | 125 | 25 | 34.91 | 126.8 | -44.1  |
| 20170622T082407 | 20170622T082415 | D | 125 | 25 | 34.9  | 126.8 | -44.4  |
| 20170622T082414 | 20170622T082422 | D | 125 | 25 | 34.9  | 126.8 | -44.7  |
| 20170622T082421 | 20170622T082429 | D | 125 | 25 | 34.89 | 126.8 | -44.9  |
| 20170622T082428 | 20170622T082436 | D | 125 | 25 | 34.88 | 126.8 | -45.2  |
| 20170622T082435 | 20170622T082443 | D | 125 | 25 | 34.86 | 126.8 | -45.5  |
| 20170622T082442 | 20170622T082450 | D | 125 | 25 | 34.85 | 126.8 | -45.7  |
| 20170622T082449 | 20170622T082457 | D | 125 | 25 | 34.84 | 126.8 | -46    |
| 20170622T082456 | 20170622T082504 | D | 125 | 25 | 34.84 | 126.8 | -46.3  |
| 20170622T082503 | 20170622T082511 | D | 125 | 25 | 34.86 | 126.8 | -46.7  |
| 20170622T082510 | 20170622T082518 | D | 125 | 25 | 34.92 | 126.8 | -47    |

|                 |                 |   |     |    |       |       |        |
|-----------------|-----------------|---|-----|----|-------|-------|--------|
| 20170622T082517 | 20170622T082525 | D | 125 | 25 | 34.86 | 126.8 | -47.2  |
| 20170624T234952 | 20170624T234956 | A | 165 | 75 | 45.18 | 39.2  | -200.9 |
| 20170624T234955 | 20170624T235003 | A | 165 | 75 | 45.2  | 39.2  | -205.4 |
| 20170624T235002 | 20170624T235010 | A | 165 | 75 | 45.22 | 39.2  | -212.3 |
| 20170624T235009 | 20170624T235015 | A | 165 | 75 | 45.23 | 39.2  | -218.5 |
| 20170625T233259 | 20170625T233302 | A | 13  | 40 | 38.42 | 13.7  | -513.6 |
| 20170625T233301 | 20170625T233309 | A | 13  | 40 | 38.49 | 13.7  | -546.4 |
| 20170625T233308 | 20170625T233315 | A | 13  | 40 | 38.49 | 13.7  | -627.7 |
| 20170626T231559 | 20170626T231602 | A | 28  | 3  | 21.4  | 34.7  | 97.9   |
| 20170626T231600 | 20170626T231608 | A | 28  | 3  | 21.38 | 34.7  | 95.2   |
| 20170626T231605 | 20170626T231608 | A | 28  | 3  | 21.37 | 34.7  | 93.2   |
| 20170627T083230 | 20170627T083238 | D | 34  | 35 | 37.12 | 140.4 | -43.8  |
| 20170627T083237 | 20170627T083245 | D | 34  | 35 | 37.17 | 140.4 | -44.1  |
| 20170627T083244 | 20170627T083252 | D | 34  | 35 | 37.21 | 140.4 | -44.3  |
| 20170627T083408 | 20170627T083416 | D | 34  | 15 | 32.51 | 118.9 | -43    |
| 20170628T081502 | 20170628T081510 | D | 49  | 35 | 37.15 | 142.5 | -43.3  |
| 20170630T234131 | 20170630T234139 | A | 89  | 70 | 44.57 | 29.8  | -274.9 |
| 20170630T234138 | 20170630T234146 | A | 89  | 70 | 44.58 | 29.8  | -289.2 |
| 20170630T234144 | 20170630T234147 | A | 89  | 70 | 44.59 | 29.8  | -294.8 |
| 20170703T082339 | 20170703T082347 | D | 125 | 35 | 37.15 | 141   | -43.2  |
| 20170703T082346 | 20170703T082354 | D | 125 | 35 | 37.18 | 141   | -43.5  |
| 20170703T082353 | 20170703T082401 | D | 125 | 35 | 37.16 | 141   | -43.8  |
| 20170703T082524 | 20170703T082532 | D | 125 | 25 | 34.85 | 122.7 | -45.1  |
| 20170703T082531 | 20170703T082539 | D | 125 | 25 | 34.87 | 122.7 | -45.5  |
| 20170706T233301 | 20170706T233304 | A | 13  | 40 | 38.43 | 37.6  | -168.7 |
| 20170706T233302 | 20170706T233310 | A | 13  | 40 | 38.49 | 37.6  | -170.2 |
| 20170706T233309 | 20170706T233316 | A | 13  | 40 | 38.5  | 37.6  | -173.4 |
| 20170708T083357 | 20170708T083403 | D | 34  | 25 | 34.85 | 80.7  | -69.6  |
| 20170708T083402 | 20170708T083410 | D | 34  | 25 | 34.84 | 80.7  | -69.8  |
| 20170708T083409 | 20170708T083417 | D | 34  | 25 | 34.86 | 80.7  | -70.1  |
| 20170709T081626 | 20170709T081634 | D | 49  | 10 | 31.37 | 75.7  | -64.5  |
| 20170709T081633 | 20170709T081641 | D | 49  | 10 | 31.37 | 75.7  | -64.8  |
| 20170709T081640 | 20170709T081648 | D | 49  | 10 | 31.31 | 75.7  | -64.9  |
| 20170709T081647 | 20170709T081655 | D | 49  | 10 | 31.39 | 75.7  | -65.2  |
| 20170714T082333 | 20170714T082341 | D | 125 | 10 | 31.37 | 81.1  | -61.6  |
| 20170716T235004 | 20170716T235011 | A | 165 | 90 | 47.82 | 55.5  | -157.6 |
| 20170716T235010 | 20170716T235018 | A | 165 | 90 | 47.83 | 55.5  | -159.5 |
| 20170716T235016 | 20170716T235019 | A | 165 | 90 | 47.84 | 55.5  | -160.7 |
| 20170717T233302 | 20170717T233310 | A | 13  | 25 | 34.89 | 28.6  | -198.1 |
| 20170717T233309 | 20170717T233317 | A | 13  | 25 | 34.91 | 28.6  | -203.5 |
| 20170717T233315 | 20170717T233318 | A | 13  | 25 | 34.89 | 28.6  | -206.6 |
| 20170718T231555 | 20170718T231602 | A | 28  | 6  | 28.75 | 15.8  | -284.1 |
| 20170718T231601 | 20170718T231609 | A | 28  | 6  | 28.77 | 15.8  | -298.3 |
| 20170719T083217 | 20170719T083225 | D | 34  | 10 | 31.35 | 82    | -58.5  |
| 20170719T083224 | 20170719T083232 | D | 34  | 10 | 31.37 | 82    | -58.7  |
| 20170719T083231 | 20170719T083239 | D | 34  | 10 | 31.32 | 82    | -58.9  |
| 20170719T083238 | 20170719T083246 | D | 34  | 10 | 31.27 | 82    | -59.1  |
| 20170719T083245 | 20170719T083253 | D | 34  | 10 | 31.35 | 82    | -59.4  |
| 20170719T083252 | 20170719T083300 | D | 34  | 10 | 31.38 | 82    | -59.7  |
| 20170719T083259 | 20170719T083307 | D | 34  | 10 | 31.38 | 82    | -59.9  |
| 20170720T081612 | 20170720T081620 | D | 49  | 30 | 36.19 | 87.1  | -67.6  |
| 20170720T081619 | 20170720T081627 | D | 49  | 30 | 36.19 | 87.1  | -67.8  |
| 20170720T081626 | 20170720T081634 | D | 49  | 30 | 36.18 | 87.1  | -68.1  |
| 20170720T081633 | 20170720T081641 | D | 49  | 30 | 36.2  | 87.1  | -68.3  |
| 20170720T081640 | 20170720T081648 | D | 49  | 30 | 36.24 | 87.1  | -68.6  |
| 20170720T081647 | 20170720T081655 | D | 49  | 30 | 36.33 | 87.1  | -68.9  |

|                 |                 |   |     |    |       |       |        |
|-----------------|-----------------|---|-----|----|-------|-------|--------|
| 20170720T081654 | 20170720T081702 | D | 49  | 30 | 36.26 | 87.1  | -69    |
| 20170720T081701 | 20170720T081709 | D | 49  | 30 | 36.26 | 87.1  | -69.3  |
| 20170722T234129 | 20170722T234134 | A | 89  | 90 | 47.81 | 52.9  | -164.8 |
| 20170722T234133 | 20170722T234141 | A | 89  | 90 | 47.82 | 52.9  | -166.7 |
| 20170724T084151 | 20170724T084159 | D | 110 | 30 | 36.21 | 88.6  | -66.6  |
| 20170724T084158 | 20170724T084206 | D | 110 | 30 | 36.21 | 88.6  | -66.8  |
| 20170724T084205 | 20170724T084213 | D | 110 | 30 | 36.24 | 88.6  | -67.1  |
| 20170727T234956 | 20170727T235004 | A | 165 | 40 | 38.46 | 38    | -171.3 |
| 20170727T235003 | 20170727T235008 | A | 165 | 40 | 38.49 | 38    | -174   |
| 20170730T083225 | 20170730T083233 | D | 34  | 30 | 36.21 | 97    | -61.3  |
| 20170730T083232 | 20170730T083240 | D | 34  | 30 | 36.23 | 97    | -61.6  |
| 20170730T083239 | 20170730T083247 | D | 34  | 30 | 36.27 | 97    | -61.9  |
| 20170730T083246 | 20170730T083254 | D | 34  | 30 | 36.28 | 97    | -62.1  |
| 20170730T083253 | 20170730T083301 | D | 34  | 30 | 36.28 | 97    | -62.4  |
| 20170730T083300 | 20170730T083308 | D | 34  | 30 | 36.27 | 97    | -62.6  |
| 20170730T083307 | 20170730T083315 | D | 34  | 30 | 36.23 | 97    | -62.9  |
| 20170730T083314 | 20170730T083322 | D | 34  | 30 | 36.19 | 97    | -63.1  |
| 20170801T235826 | 20170801T235834 | A | 74  | 65 | 43.41 | 42.2  | -182.6 |
| 20170802T234128 | 20170802T234134 | A | 89  | 35 | 37.15 | 27.1  | -221.1 |
| 20170802T234133 | 20170802T234141 | A | 89  | 35 | 37.18 | 27.1  | -227.4 |
| 20170802T234140 | 20170802T234147 | A | 89  | 35 | 37.2  | 27.1  | -234.9 |
| 20170810T083240 | 20170810T083248 | D | 34  | 40 | 38.45 | 104.8 | 61.7   |
| 20170810T083247 | 20170810T083255 | D | 34  | 40 | 38.48 | 104.8 | 62     |
| 20170811T081628 | 20170811T081636 | D | 49  | 20 | 33.83 | 91.5  | -58.2  |
| 20170811T081635 | 20170811T081643 | D | 49  | 20 | 33.83 | 91.5  | -58.5  |
| 20170811T081642 | 20170811T081650 | D | 49  | 20 | 33.85 | 91.5  | -58.9  |
| 20170811T081649 | 20170811T081657 | D | 49  | 20 | 33.94 | 91.5  | -59.3  |
| 20170815T084124 | 20170815T084132 | D | 110 | 10 | 31.38 | 93.3  | -52.1  |
| 20170815T084131 | 20170815T084139 | D | 110 | 10 | 31.45 | 93.3  | -52.5  |
| 20170815T084138 | 20170815T084146 | D | 110 | 10 | 31.4  | 93.3  | -52.8  |
| 20170815T084145 | 20170815T084153 | D | 110 | 10 | 31.45 | 93.3  | -53.1  |
| 20170816T082459 | 20170816T082507 | D | 125 | 30 | 36.22 | 95.3  | -61.2  |
| 20170816T082506 | 20170816T082514 | D | 125 | 30 | 36.23 | 95.3  | -61.5  |
| 20170816T082513 | 20170816T082521 | D | 125 | 30 | 36.27 | 95.3  | -61.9  |
| 20170816T082520 | 20170816T082528 | D | 125 | 30 | 36.24 | 95.3  | -62.1  |
| 20170816T082527 | 20170816T082535 | D | 125 | 30 | 36.24 | 95.3  | -62.5  |
| 20170816T082534 | 20170816T082542 | D | 125 | 30 | 36.25 | 95.3  | -62.9  |
| 20170816T082541 | 20170816T082549 | D | 125 | 30 | 36.27 | 95.3  | -63.4  |

## 4 References

- Friedl, P., Seehaus, T.C., Wendt, A., Braun, M.H., Höppner, K., 2018. Recent dynamic changes on Fleming Glacier after the disintegration of Wordie Ice Shelf, Antarctic Peninsula. *The Cryosphere* 12, 1347–1365. <https://doi.org/10.5194/tc-12-1347-2018>
- Howat, I., Porter, C., Noh, M.-J., Husby, E., Khuvis, S., Danish, E., Tomko, K., Gardiner, J., Negrete, A., Yadav, B., Klassen, J., Kelleher, C., Cloutier, M., Bakker, J., Enos, J., Arnold, G., Bauer, G., Morin, P., 2022. The Reference Elevation Model of Antarctica - Strips, Version 4.1. <https://doi.org/10.7910/DVN/X7NDNY>
- Rott, H., Abdel Jaber, W., Wuite, J., Scheiblauer, S., Floricioiu, D., van Wessem, J.M., Nagler, T., Miranda, N., van den Broeke, M.R., 2018. Changing pattern of ice flow and mass balance for glaciers discharging into the Larsen A and B embayments, Antarctic Peninsula, 2011 to 2016. *The Cryosphere* 12, 1273–1291. <https://doi.org/10.5194/tc-12-1273-2018>
- Sommer, C., Seehaus, T., Glazovsky, A., Braun, M.H., 2022. Brief communication: Increased glacier mass loss in the Russian High Arctic (2010–2017). *The Cryosphere* 16, 35–42. <https://doi.org/10.5194/tc-16-35-2022>
- Studinger, M., 2014. IceBridge ATM L4 Surface Elevation Rate of Change, Version 1. <https://doi.org/10.5067/BCW6CI3TXOCY>
- van Wessem, J.M., Ligtenberg, S.R.M., Reijmer, C.H., van de Berg, W.J., van den Broeke, M.R., Barrand, N.E., Thomas, E.R., Turner, J., Wuite, J., Scambos, T.A., van Meijgaard, E., 2015. The modelled surface mass balance of the Antarctic Peninsula at 5.5 km horizontal resolution. *The Cryosphere Discuss.* 9, 5097–5136. <https://doi.org/10.5194/tcd-9-5097-2015>
